# Supplementary material
Source: Springer Nature journal article supplement (https://www.springermedizin.de/resource/supplementary/12891_2010_971_MOESM1_ESM.pdf/9506830)
Supplement: MOESM1 [file 9506830]

Enrolment

Patients with hip fracture (n=935)

Excluded (n=773)  
Did not meet inclusion criteria (n=590)  
Refused to participate (n=183)

Allocation

Randomized (n=162)

Allocated to intervention program group (n=80)

Allocated to control group (n=82)

Follow up

1-month follow-up (n=71)  
Dropped out (n=9)  
Died (n=1)  
Refused to participate (n=8)

1-month follow-up (n=76)  
Dropped out (n=6)  
Refused to participate (n=6)

3-month follow-up (n=67)  
Dropped out (n=4)  
Refused to participate (n=4)

3-month follow-up (n=70)  
Dropped out (n=6)  
Died (n=3)  
Refused to participate (n=3)

6-month follow-up (n=65)  
Dropped out (n=2)  
Refused to participate (n=2)

6-month follow-up (n=68)  
Dropped out (n=2)  
Refused to participate (n=1)  
Died (n=1)

1-year follow-up (n=60)  
Dropped out (n=5)  
Died (n=3)  
Refused to participate (n=2)

1-year follow-up (n=62)  
Dropped out (n=6)  
Died (n=2)  
Refused to participate (n=4)
